# Supplementary material for: Correlation between Saliva Levels and Serum Levels of Free Uremic Toxins in Healthy Volunteers
Source: MDPI journal article supplement (doi:10.3390/toxins15020150), 2023-02-13
Supplement: s1 [file s1]

Supplementary document S2. Molecular mass, chemical formula, retention time (RT), ionization mode, and analytical parameters.

| Compounds              | Molecular weight (g/mol) | Chemical formula                                              | Retention time (min) | Ionization Mode (ESI) | Parent ion ( <i>m/z</i> ) | Fragment ion ( <i>m/z</i> ) | Collision Energy (V) |
|------------------------|--------------------------|---------------------------------------------------------------|----------------------|-----------------------|---------------------------|-----------------------------|----------------------|
| TMAO                   | 75.1                     | C <sub>3</sub> H <sub>9</sub> NO                              | 0.60                 | +                     | 76.4                      | 58.2<br>59.2                | 19<br>12             |
| Tyrosine               | 181.1                    | C <sub>9</sub> H <sub>11</sub> NO <sub>3</sub>                | 0.78                 | +                     | 182.1                     | 136.1<br>165.0              | 30<br>20             |
| Phenylalanine          | 165.1                    | C <sub>9</sub> H <sub>11</sub> NO <sub>2</sub>                | 1.57                 | +                     | 166.2                     | 120.1<br>103.0              | 14<br>27             |
| Kynurenine             | 208.1                    | C <sub>10</sub> H <sub>12</sub> N <sub>2</sub> O <sub>3</sub> | 1.87                 | +                     | 213.1                     | 98.2<br>146.4               | 15<br>19             |
| Tryptophan             | 204.1                    | C <sub>11</sub> H <sub>12</sub> N <sub>2</sub> O <sub>2</sub> | 4.75                 | +                     | 205.1                     | 188.1<br>146.0              | 10<br>17             |
| Hippuric acid          | 179.1                    | C <sub>9</sub> H <sub>9</sub> NO <sub>3</sub>                 | 4.75                 | -                     | 178.1                     | 77.1<br>131.8               | 17<br>21             |
| Phenylacetyl-glutamine | 264.1                    | C <sub>13</sub> H <sub>16</sub> N <sub>2</sub> O <sub>4</sub> | 4.82                 | +                     | 270.1                     | 130.1<br>136.1              | 15<br>15             |
| p-cresyl glucuronide   | 284.1                    | C <sub>13</sub> H <sub>16</sub> O <sub>7</sub>                | 5.08                 | -                     | 283.1                     | 107.1<br>113.1              | 31<br>12             |
| Kynurenic acid         | 189.0                    | C <sub>10</sub> H <sub>7</sub> NO <sub>3</sub>                | 5.63                 | +                     | 190.1                     | 116.0<br>190.1              | 31<br>19             |
| Indoxyl sulfate        | 213.0                    | C <sub>8</sub> H <sub>7</sub> NO <sub>4</sub> S               | 5.75                 | -                     | 212.1                     | 80.0<br>81.0                | 23<br>17             |
| Indole-3-acetic acid   | 175.1                    | C <sub>10</sub> H <sub>9</sub> NO <sub>2</sub>                | 6.00                 | +                     | 176                       | 130.1<br>103.1              | 16<br>31             |
| p-cresyl sulfate       | 188.0                    | C <sub>7</sub> H <sub>8</sub> O <sub>4</sub> S                | 6.18                 | -                     | 187.1                     | 107.1<br>105.1              | 21<br>34             |
| CMPF                   | 240.1                    | C <sub>12</sub> H <sub>16</sub> O <sub>5</sub>                | 7.05                 | -                     | 239.1                     | 195.1<br>151.1              | 12<br>16             |
