# Supplementary material for: Correlation between Saliva Levels and Serum Levels of Free Uremic Toxins in Healthy Volunteers
Source: MDPI journal article supplement (doi:10.3390/toxins15020150), 2023-02-13
Supplement: s1 [file s1]

## Validation report

### 1. Validation Method

#### 1.1. Linearity

Six calibration curves were prepared with eight calibration standards (CS). Quantification was achieved by plotting the peak area ratios of uremic toxins (UT) to their internal standards (IS), and a weighting factor was determined. Back-calculated concentrations of the CS have to be within 85–115% of the nominal concentrations, except for the lower limit of quantification (LLOQ) a deviation of 20% was considered acceptable.

#### 1.2. Lower Limit of Quantification (LLOQ)

The LLOQ was the lowest concentration of each UT achievable with an accuracy between 80 and 120 % and a coefficient of variation of  $\pm 20$  % obtained over six measurements at three different days. Depending to the UT, four levels were evaluated: 1, 5, 10 and 50 ng/mL.

#### 1.3. Carry over

A blank sample was analyzed immediately after running three replicates of the highest CS to determine the carryover.

#### 1.4. Accuracy and precision

The accuracy (bias, %) and precision (coefficient of variation, CV %) of the assay were determined for the four QC levels (30, 150, 8000 and 40000 ng/mL) over three different days. Each day, 6 replicates of each QC were processed. The intra-assay bias and CV takes into account the variability of the 6 replicates within each validation day and the inter-assay bias and CV evaluates the variability between the three validation days. An accuracy within the range 85-115% of the nominal values and a precision with a CV of  $\pm 15$ % were required.

## 2. Validation results

### 2.1. Linearity

Table S1. Linearity range, mean correlation coefficient and mean slope.

| Molecules             | Linearity<br>(ng/mL) | R <sup>2</sup> ± SD | Slope ± SD       |
|-----------------------|----------------------|---------------------|------------------|
| TMAO <sup>1</sup>     | 1-50000              | 0.9993 ± 0.0004     | 0.0032 ± 0.0035  |
| Tyrosine              | 50-50000             | 0.9992 ± 0.0009     | 0.0111 ± 0.0055  |
| Phenylalanine         | 50-50000             | 0.9986 ± 0.0009     | 0.0023 ± 0.0003  |
| Kynurenine            | 50-50000             | 0.9987 ± 0.0020     | 0.0064 ± 0.0031  |
| Tryptophan            | 50-50000             | 0.9992 ± 0.0003     | 0.0047 ± 0.0005  |
| Hippuric acid         | 5-50000              | 0.9990 ± 0.0006     | 0.0002 ± 0.00003 |
| Phenylacetylglutamine | 10-50000             | 0.9991 ± 0.0007     | 0.0154 ± 0.0083  |
| Indoxyl sulfate       | 1-50000              | 0.9993 ± 0.0006     | 0.0140 ± 0.0027  |
| Kynurenic acid        | 10-50000             | 0.9992 ± 0.0007     | 0.0206 ± 0.0038  |
| P-cresyl glucuronide  | 10-10000             | 0.9991 ± 0.0009     | 0.0022 ± 0.0003  |
| PCS <sup>2</sup>      | 1-50000              | 0.9995 ± 0.0004     | 0.1648 ± 0.0355  |
| Indole-3-acetic acid  | 5-50000              | 0.9991 ± 0.0003     | 0.0057 ± 0.0010  |
| CMPF <sup>3</sup>     | 1-50000              | 0.9993 ± 0.0007     | 0.0009 ± 0.0007  |

<sup>1</sup>Trimethylamine-N-oxide; <sup>2</sup>P-cresyl sulfate; <sup>3</sup>3-carboxy-4-methyl-5-propyl-2-furanpropanoic acid

Table S2. Mean concentration of calibrant, standard deviation, coefficient of variation and bias.

| Molecules         |            | Theoretical concentrations (ng/mL) |      |      |      |      |       |       |       |
|-------------------|------------|------------------------------------|------|------|------|------|-------|-------|-------|
|                   |            | 10                                 | 50   | 100  | 500  | 1000 | 5000  | 10000 | 50000 |
| TMAO <sup>1</sup> | Mean (n=6) | 10.8                               | 49.3 | 98.4 | 484  | 1020 | 4771  | 10125 | 50088 |
|                   | SD         | 0.55                               | 3.48 | 6.85 | 30.8 | 60.4 | 272   | 435   | 491   |
|                   | CV         | 5%                                 | 7%   | 7%   | 6%   | 6%   | 6%    | 4%    | 1%    |
|                   | Bias       | -7%                                | 1%   | 2%   | 3%   | -2%  | 5%    | -1%   | 0%    |
| Tyrosine          | Mean (n=6) | -                                  | 51.1 | 91.9 | 532  | 987  | 5040  | 10013 | 49840 |
|                   | SD         | -                                  | 4.91 | 9.63 | 40.3 | 76.5 | 136   | 97.1  | 48.4  |
|                   | CV         | -                                  | 10%  | 10%  | 8%   | 8%   | 3%    | 1%    | 0%    |
|                   | Bias       | -                                  | -2%  | 8%   | -6%  | 1%   | -1%   | 0%    | 0%    |
| Phenylalanine     | Mean (n=6) | -                                  | 48   | 99.2 | 515  | 1065 | 4977  | 10307 | 44407 |
|                   | SD         | -                                  | 2.32 | 5.05 | 36.1 | 49.4 | 359.6 | 690.6 | 15980 |
|                   | CV         | -                                  | 5%   | 5%   | 7%   | 5%   | 7%    | 7%    | 4%    |
|                   | Bias       | -                                  | 5    | 1%   | -3%  | -6%  | 0%    | -3%   | 11%   |
| Kynurenine        | Mean (n=6) | 10.4                               | 48.6 | 97.3 | 491  | 1026 | 4929  | 10117 | 49764 |
|                   | SD         | 0.75                               | 4.32 | 5.30 | 39.1 | 76.4 | 325   | 176   | 430   |
|                   | CV         | 7%                                 | 9%   | 5%   | 8%   | 7%   | 7%    | 2%    | 1%    |

|                       |            |      |      |      |      |      |      |       |       |
|-----------------------|------------|------|------|------|------|------|------|-------|-------|
|                       | Bias       | -4%  | 3%   | 3%   | 2%   | -3%  | 1%   | -1%   | 0%    |
| Tryptophan            | Mean (n=6) | 11.1 | 50.3 | 96.4 | 502  | 1010 | 4862 | 9928  | 50338 |
|                       | SD         | 0.70 | 3.58 | 6.41 | 56.1 | 38.5 | 222  | 540   | 656   |
|                       | CV         | 6%   | 7%   | 7%   | 11%  | 4%   | 5%   | 5%    | 1%    |
|                       | Bias       | -11% | -1%  | 4%   | 0%   | -1%  | 3%   | 1%    | -1%   |
| Hippuric acid         | Mean (n=6) | -    | 53.5 | 103  | 476  | 977  | 4748 | 10255 | 50322 |
|                       | SD         | -    | 1.81 | 6.77 | 34.0 | 50.2 | 262  | 304   | 662   |
|                       | CV         | -    | 3%   | 7%   | 7%   | 5%   | 6%   | 3%    | 1%    |
|                       | Bias       | -    | -7%  | -4%  | 5%   | 2%   | 5%   | -3%   | -1%   |
| Phenylacetylglutamine | Mean (n=6) | 10.8 | 48.9 | 95.7 | 477  | 1046 | 4854 | 10151 | 50240 |
|                       | SD         | 1.21 | 3.50 | 4.92 | 30.2 | 77.1 | 236  | 451   | 731   |
|                       | CV         | 11%  | 7%   | 5%   | 6%   | 7%   | 5%   | 4%    | 1%    |
|                       | Bias       | -8%  | 2%   | 4%   | 5%   | -5%  | 3%   | -2%   | 0%    |
| Indole-3-acetic acid  | Mean (n=6) | -    | 53.3 | 96.6 | 486  | 1012 | 4889 | 10115 | 50248 |
|                       | SD         | -    | 2.29 | 5.49 | 42.7 | 35.9 | 285  | 573   | 525   |
|                       | CV         | -    | 4%   | 6%   | 9%   | 4%   | 6%   | 6%    | 1%    |
|                       | Bias       | -    | -7%  | 3%   | 3%   | -1%  | 2%   | -1%   | 0%    |
| p cresyl glucuronide  | Mean (n=6) | 9.99 | 47.6 | 101  | 503  | 1039 | 4987 | 10102 | -     |
|                       | SD         | 1.09 | 1.80 | 8.31 | 42.3 | 62.7 | 224  | 298   | -     |
|                       | CV         | 11%  | 4%   | 8%   | 8%   | 6%   | 4%   | 3%    | -     |
|                       | Bias       | 1%   | 5%   | -1%  | -1%  | -4%  | 0%   | -1%   | -     |
| CMPF <sup>2</sup>     | Mean (n=6) | 10.4 | 50.9 | 95.8 | 481  | 1029 | 4944 | 10129 | 50169 |
|                       | SD         | 0.56 | 4.52 | 5.46 | 42.8 | 35.7 | 250  | 240   | 759   |
|                       | CV         | 5%   | 9%   | 6%   | 9%   | 3%   | 5%   | 2%    | 2%    |
|                       | Bias       | -4%  | -2%  | 4%   | 4%   | -3%  | 1%   | -1%   | 0%    |
| Indoxyl sulfate       | Mean (n=6) | 10.1 | 50.2 | 99.1 | 491  | 1032 | 4966 | 10299 | 49866 |
|                       | SD         | 1.64 | 4.54 | 7.83 | 38.7 | 73.9 | 338  | 209   | 422   |
|                       | CV         | 16%  | 9%   | 8%   | 8%   | 7%   | 7%   | 2%    | 1%    |
|                       | Bias       | -1%  | 0%   | 1%   | 2%   | -3%  | 1%   | -3%   | 0%    |
| Kynurenic acid        | Mean (n=6) | 10.1 | 48.2 | 101  | 495  | 1043 | 4914 | 10095 | 50308 |
|                       | SD         | 0.95 | 3.91 | 5.00 | 41.1 | 52.1 | 283  | 432   | 666   |
|                       | CV         | 9%   | 8%   | 5%   | 8%   | 5%   | 6%   | 4%    | 1%    |
|                       | Bias       | -1%  | 4%   | 0%   | 1%   | -4%  | 2%   | -1%   | -1%   |
| PCS <sup>3</sup>      | Mean (n=6) | 9.91 | 48.9 | 97.3 | 515  | 1028 | 4983 | 10052 | 49944 |
|                       | SD         | 0.78 | 3.21 | 6.19 | 34.2 | 40.8 | 302  | 313   | 496.  |
|                       | CV         | 8%   | 7%   | 6%   | 7%   | 4%   | 6%   | 3%    | 1%    |
|                       | Bias       | 1%   | 2%   | 3%   | -3%  | -3%  | 0%   | -1%   | 0%    |

<sup>1</sup>Trimethylamine-N-oxide; <sup>2</sup>3-carboxy-4-methyl-5-propyl-2-furanpropanoic acid; <sup>3</sup>P-cresyl sulfate.

## 2.2. Lower Limit of Quantification

Table S3. Lower limit of quantification (LLOQ).

| Molecules             | Intra-day (n=6) |        |          | Inter-day (n=6) |          |
|-----------------------|-----------------|--------|----------|-----------------|----------|
|                       | LLOQ (ng/mL)    | CV (%) | Bias (%) | CV (%)          | Bias (%) |
| TMAO <sup>1</sup>     | 1               | 12.5   | 11       | 7.8             | 14.9     |
| Tyrosine              | 50              | 8.5    | -3.4     | 10.0            | -2.2     |
| Phenylalanine         | 50              | 4.4    | -5.8     | 5.0             | 5.4      |
| Kynurenine            | 50              | 6.8    | 0.0      | 7.0             | 3.8      |
| Tryptophan            | 50              | 5.1    | -6.8     | 6.0             | -3.0     |
| Hippuric acid         | 5               | 11.3   | -0.4     | 8.6             | 3.3      |
| Phenylacetylglutamine | 10              | 10.7   | -18.0    | 11.0            | -12.0    |
| Indoxyl sulfate       | 1               | 16.2   | 2.7      | 10.9            | -1.0     |
| Kynurenic acid        | 10              | 6.3    | 0.0      | 9.0             | -1.0     |
| P-cresyl glucuronide  | 10              | 13.5   | 1.0      | 11.0            | -2.0     |
| PCS                   | 1               | 6.4    | 6.2      | 14.0            | 9.9      |
| Indole-3-acetic acid  | 5               | 8.5    | -7.6     | 19.6            | 2.5      |
| CMPF <sup>3</sup>     | 1               | 3.5    | 7.5      | 7.2             | 11.2     |

<sup>1</sup>Trimethylamine-N-oxide; <sup>2</sup>P-cresyl sulfate; <sup>3</sup>3-carboxy-4-methyl-5-propyl-2-furanpropanoic acid

## 2.3. Carry over

No chromatographic peaks were evident for the analytes and for the internal standards when a blank was injected just after the highest point in the calibration.

#### 2.4. Accuracy and precision

Table S4. Intra-day and inter-day accuracy and precision.

| Molecules             | Theoretical concentration<br>(ng/mL) | Intra-day repeatability<br>(n = 6) |          | Inter-day repeatability<br>(n = 6) |          |
|-----------------------|--------------------------------------|------------------------------------|----------|------------------------------------|----------|
|                       |                                      | CV (%)                             | Bias (%) | CV (%)                             | Bias (%) |
| TMAO <sup>1</sup>     | 30                                   | 3.3                                | 16.7     | 7.9                                | 3.3      |
|                       | 150                                  | 2.4                                | -3.3     | 7.5                                | -0.7     |
|                       | 8000                                 | 1.6                                | -8.0     | 7.8                                | -0.7     |
|                       | 40000                                | 6.9                                | 5.7      | 5.2                                | -5.0     |
| Tyrosine              | 30                                   | < LOQ                              |          |                                    |          |
|                       | 150                                  | 10.5                               | 12.0     | 10.8                               | -2.7     |
|                       | 8000                                 | 4.1                                | -3.1     | 5.2                                | -0.4     |
|                       | 40000                                | 6.5                                | 9.4      | 4.1                                | -11.1    |
| Phenylalanine         | 30                                   | < LOQ                              |          |                                    |          |
|                       | 150                                  | 8.6                                | -3.3     | 9.1                                | -2.7     |
|                       | 8000                                 | 2.0                                | -10.2    | 5.3                                | -4.0     |
|                       | 40000                                | 5.0                                | 10.4     | 4.9                                | 1.6      |
| Kynurenine            | 30                                   | < LOQ                              |          |                                    |          |
|                       | 150                                  | 4.3                                | 3.3      | 8.8                                | 1.3      |
|                       | 8000                                 | 1.9                                | -12.4    | 6.6                                | -3.5     |
|                       | 40000                                | 5.0                                | -5.1     | 7.9                                | -4.9     |
| Tryptophan            | 30                                   | < LOQ                              |          |                                    |          |
|                       | 150                                  | 7.2                                | 10.0     | 13.0                               | -4.7     |
|                       | 8000                                 | 4.7                                | -7.9     | 9.0                                | -0.2     |
|                       | 40000                                | 3.8                                | 11.0     | 7.5                                | -0.3     |
| Hippuric acid         | 30                                   | 11.8                               | 6.7      | 7.7                                | -0.7     |
|                       | 150                                  | 5.8                                | 6.7      | 5.2                                | 2.0      |
|                       | 8000                                 | 5.8                                | 4.3      | 5.1                                | -2.5     |
|                       | 40000                                | 3.1                                | 10.8     | 5.7                                | -3.1     |
| Phenylacetylglutamine | 30                                   | 12.6                               | 10.0     | 9.0                                | 6.7      |
|                       | 150                                  | 5.9                                | 2.0      | 5.6                                | 3.3      |
|                       | 8000                                 | 5.3                                | -0.5     | 10.6                               | -1.8     |
|                       | 40000                                | 6.2                                | 7.9      | 9.2                                | -0.2     |
| Indoxyl sulfate       | 30                                   | 8.8                                | 3.3      | 3.3                                | 1.3      |
|                       | 150                                  | 4.3                                | 6.7      | 5.9                                | 3.3      |
|                       | 8000                                 | 10.1                               | -1.7     | 7.0                                | -5.1     |
|                       | 40000                                | 7.6                                | 6.7      | 10.9                               | -2.2     |
| Kynurenic acid        | 30                                   | 4.8                                | 13.3     | 8.1                                | 3.3      |
|                       | 150                                  | 2.5                                | -3.3     | 6.6                                | 0.0      |
|                       | 8000                                 | 2.0                                | -9.7     | 7.9                                | -1.4     |
|                       | 40000                                | 4.4                                | 8.0      | 4.1                                | -2.0     |
| p-cresyl glucuronide  | 30                                   | 12.3                               | 6.7      | 10.2                               | 3.3      |
|                       | 150                                  | 6.5                                | -4.0     | 2.4                                | -2.0     |
|                       | 8000                                 | 4.1                                | 0.8      | 2.8                                | -2.9     |
|                       | 40000                                | > limit of linearity               |          |                                    |          |
| PCS <sup>2</sup>      | 30                                   | 7.8                                | 10.0     | 4.4                                | 10.0     |
|                       | 150                                  | 4.9                                | 0.0      | 6.6                                | -1.3     |
|                       | 8000                                 | 7.0                                | 2.4      | 8.0                                | -2.2     |
|                       | 40000                                | 8.1                                | 1.9      | 6.4                                | -1.8     |
| Indole-3-acetic acid  | 30                                   | 4.4                                | -3.3     | 7.2                                | -1.0     |
|                       | 150                                  | 3.5                                | 5.3      | 8.7                                | 2.7      |
|                       | 8000                                 | 3.1                                | -7.8     | 9.6                                | -5.1     |
|                       | 40000                                | 8.3                                | 1.6      | 7.4                                | -2.2     |
| CMPF <sup>3</sup>     | 30                                   | 12.8                               | 3.3      | 8.1                                | -6.7     |
|                       | 150                                  | 4.1                                | 3.3      | 7.0                                | 0.7      |
|                       | 8000                                 | 3.3                                | -10.0    | 8.5                                | -1.5     |
|                       | 40000                                | 4.2                                | 9.6      | 7.6                                | -3.3     |

<sup>1</sup>Trimethylamine-N-oxide; <sup>2</sup>P-cresyl sulfate; <sup>3</sup>3-carboxy-4-methyl-5-propyl-2-furanpropanoic acid
